# Supplementary material for: Dealumination and Characterization of Natural Mordenite-Rich Tuffs
Source: MDPI journal article supplement (doi:10.3390/ma15134654), 2022-07-01
Supplement: s1 [file s1]

## **Dealumination of Natural Mordenite and Its Potential Use as Catalyst Support**

Armando Adriano<sup>1,2</sup>, Mauricio Cornejo<sup>1,2\*</sup>, Hacı Baykara<sup>1,2</sup>, Eduardo V. Ludeña<sup>1,3</sup>,  
Joaquín L. Brito<sup>3</sup>

<sup>1</sup> Escuela Superior Politécnica del Litoral, ESPOL, Center of Research and Development in Nanotechnology, CIDNA, Km 30.5 vía Perimetral, Campus G. Galindo, Guayaquil, Ecuador.

<sup>2</sup> Escuela Superior Politécnica del Litoral, ESPOL, Facultad de Ingeniería Mecánica y Ciencias de la Producción, FIMCP, Km 30.5 via Perimetral, Campus Gustavo Galindo, Guayaquil, Ecuador.

<sup>3</sup> Laboratorio de Fisicoquímica de Superficies, Centro de Química, Instituto Venezolano de Investigaciones Científicas, I.V.I.C. Apartado 2182.

---

\* Corresponding author: M.Cornejo, [mcornejo@espol.edu.ec](mailto:mcornejo@espol.edu.ec)

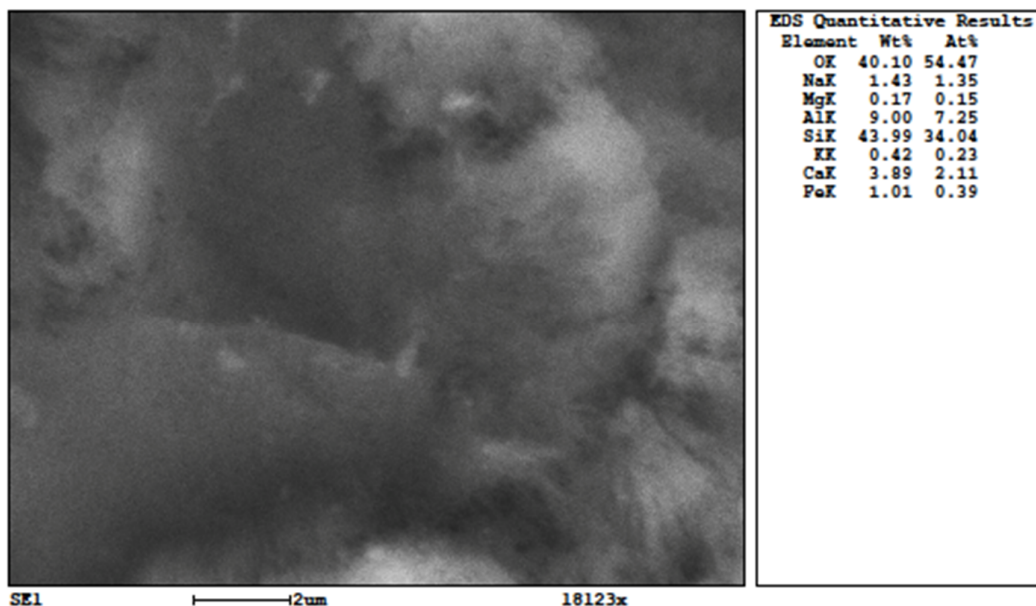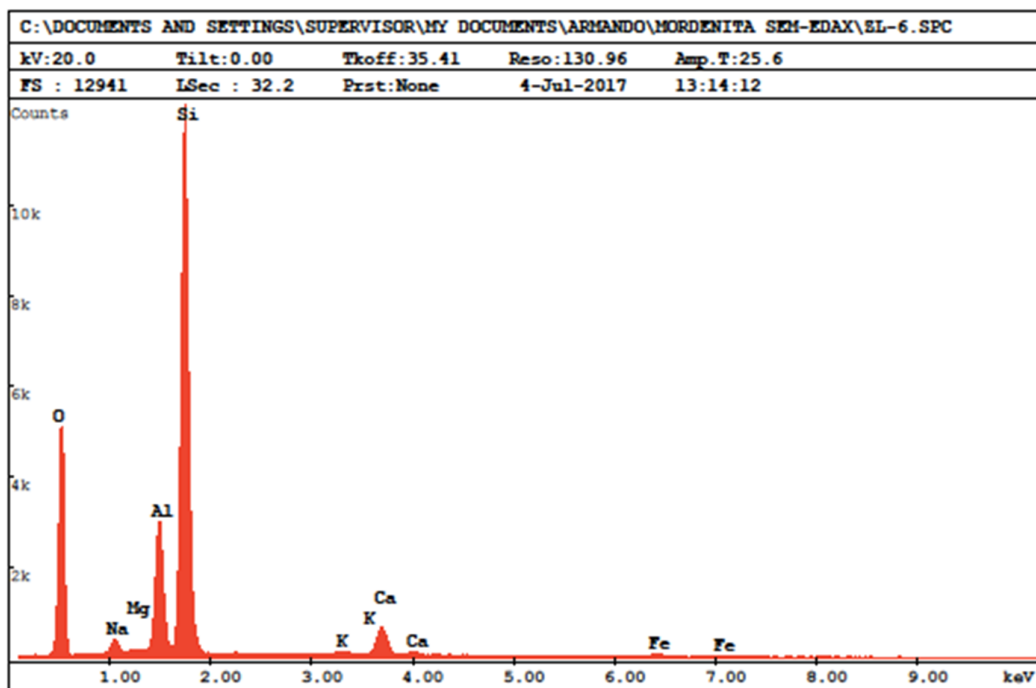

Figure S1. SEM-EDS analysis of ZL sample.

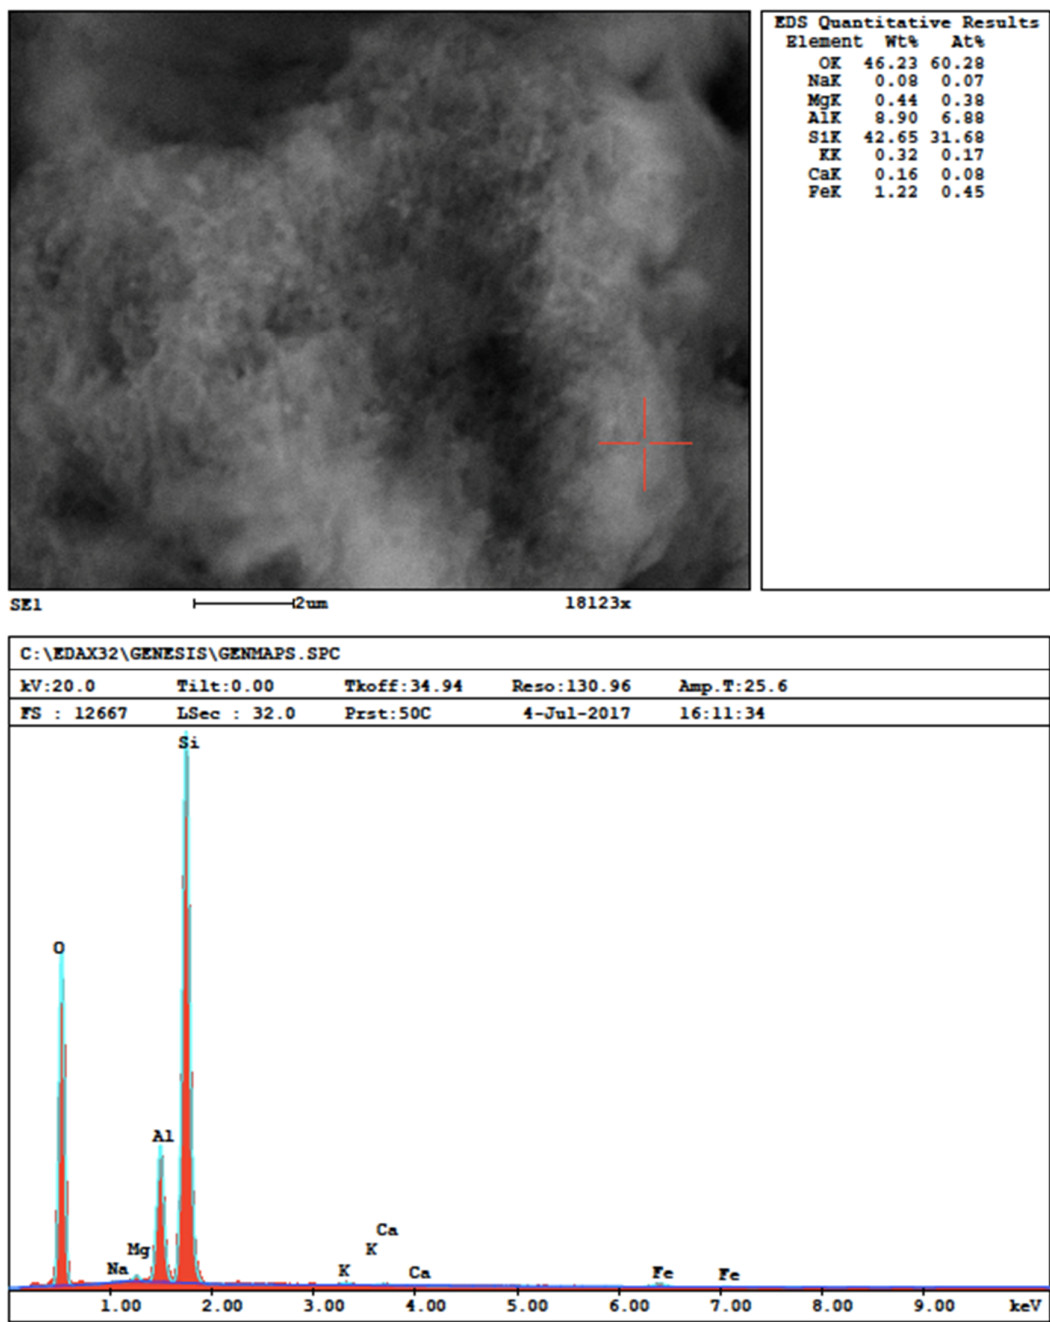

Figure S2. SEM-EDS analysis of ZAM sample.

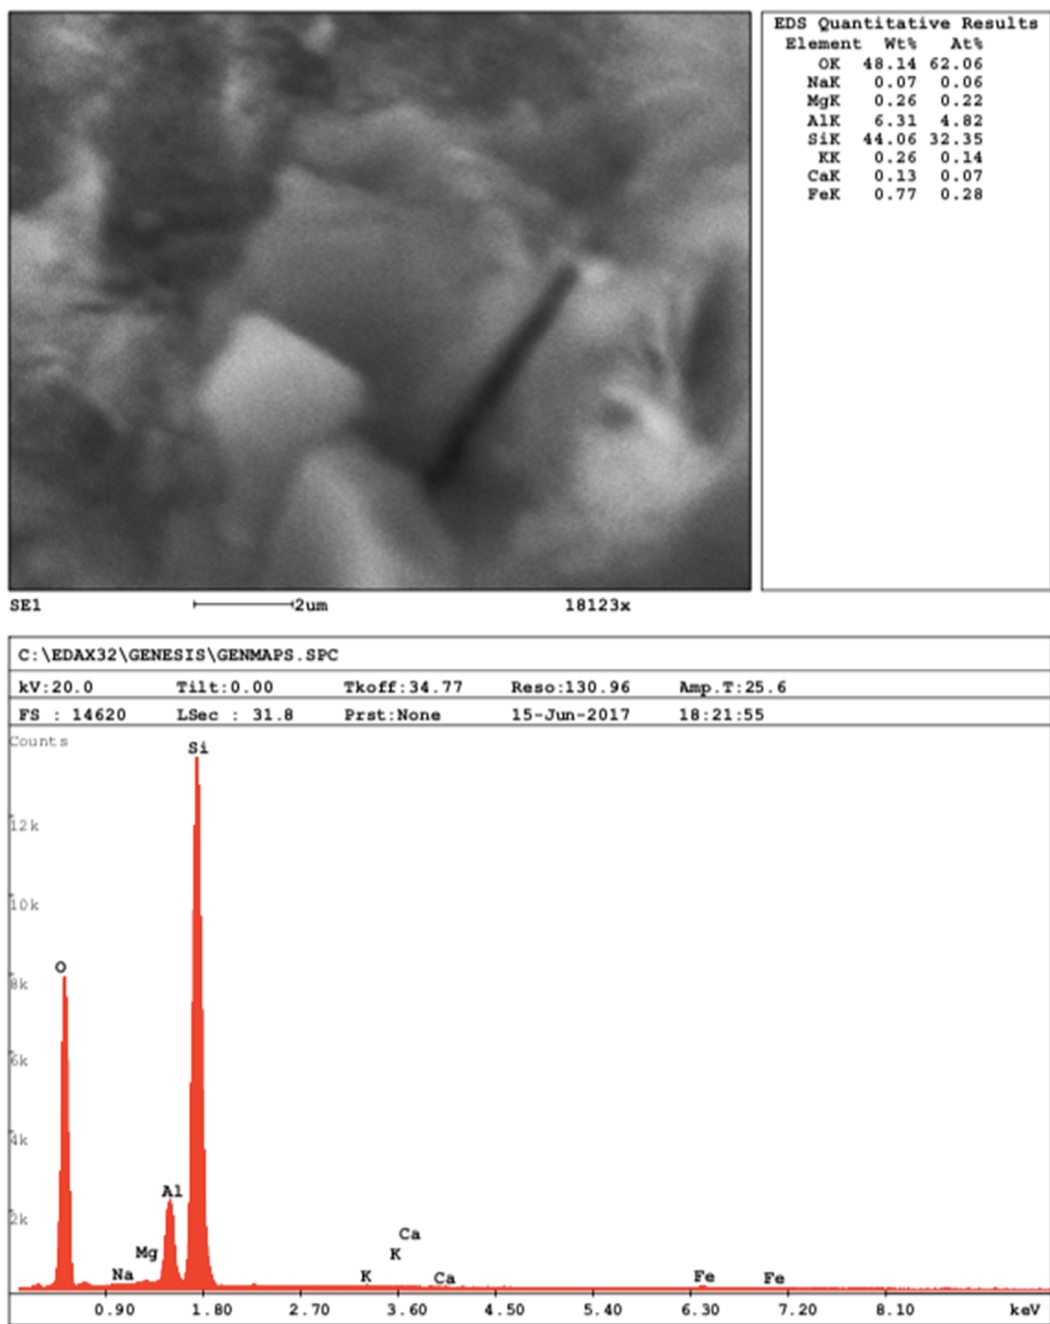

Figure S3. SEM-EDS analysis of ZDES1 sample.

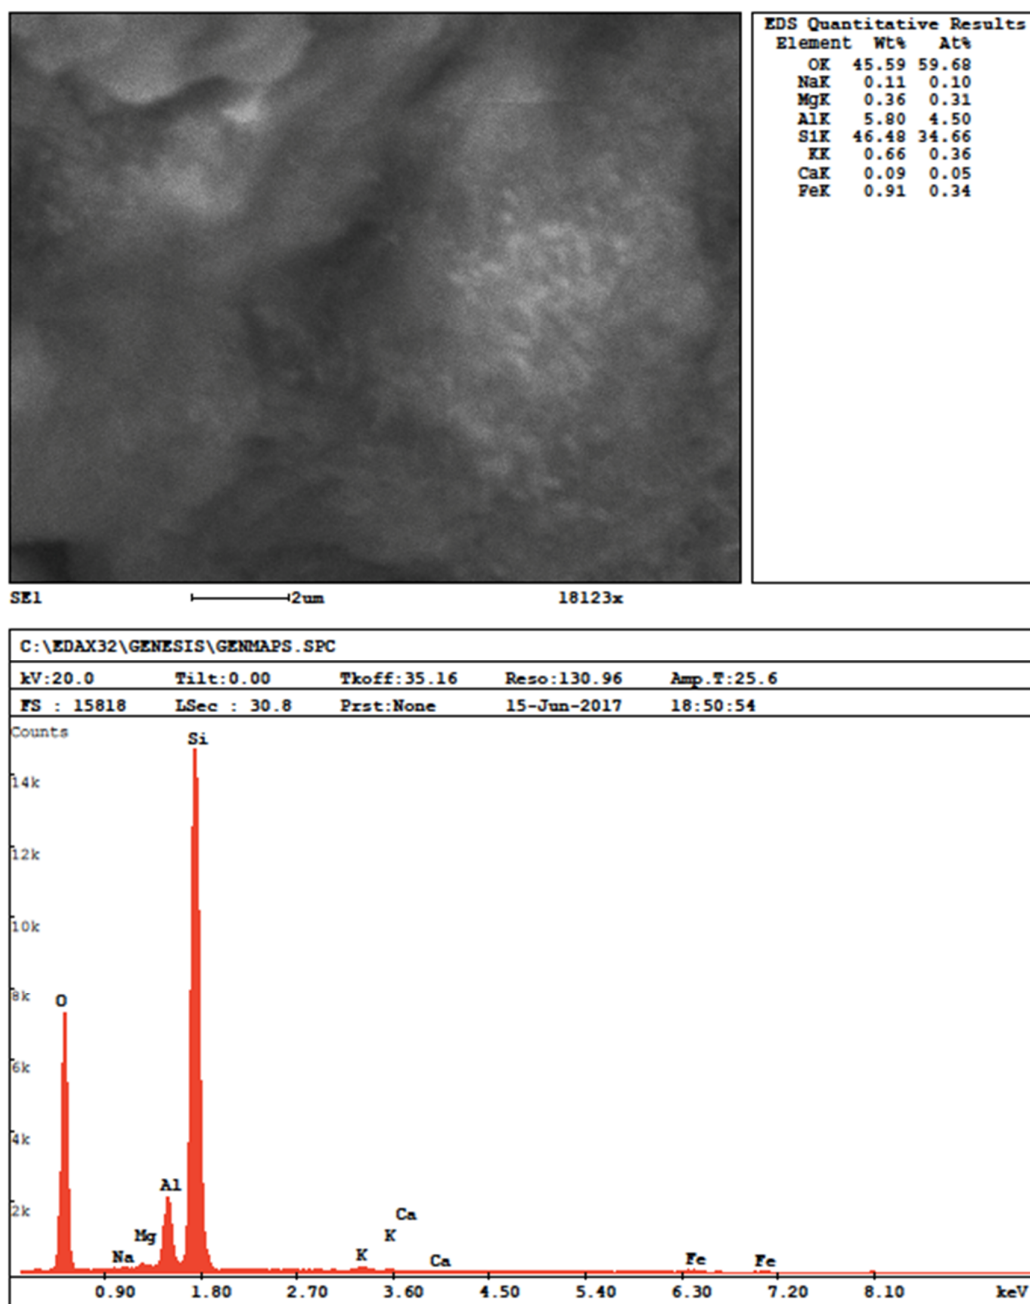

Figure S4. SEM-EDS analysis of ZDES3 sample.

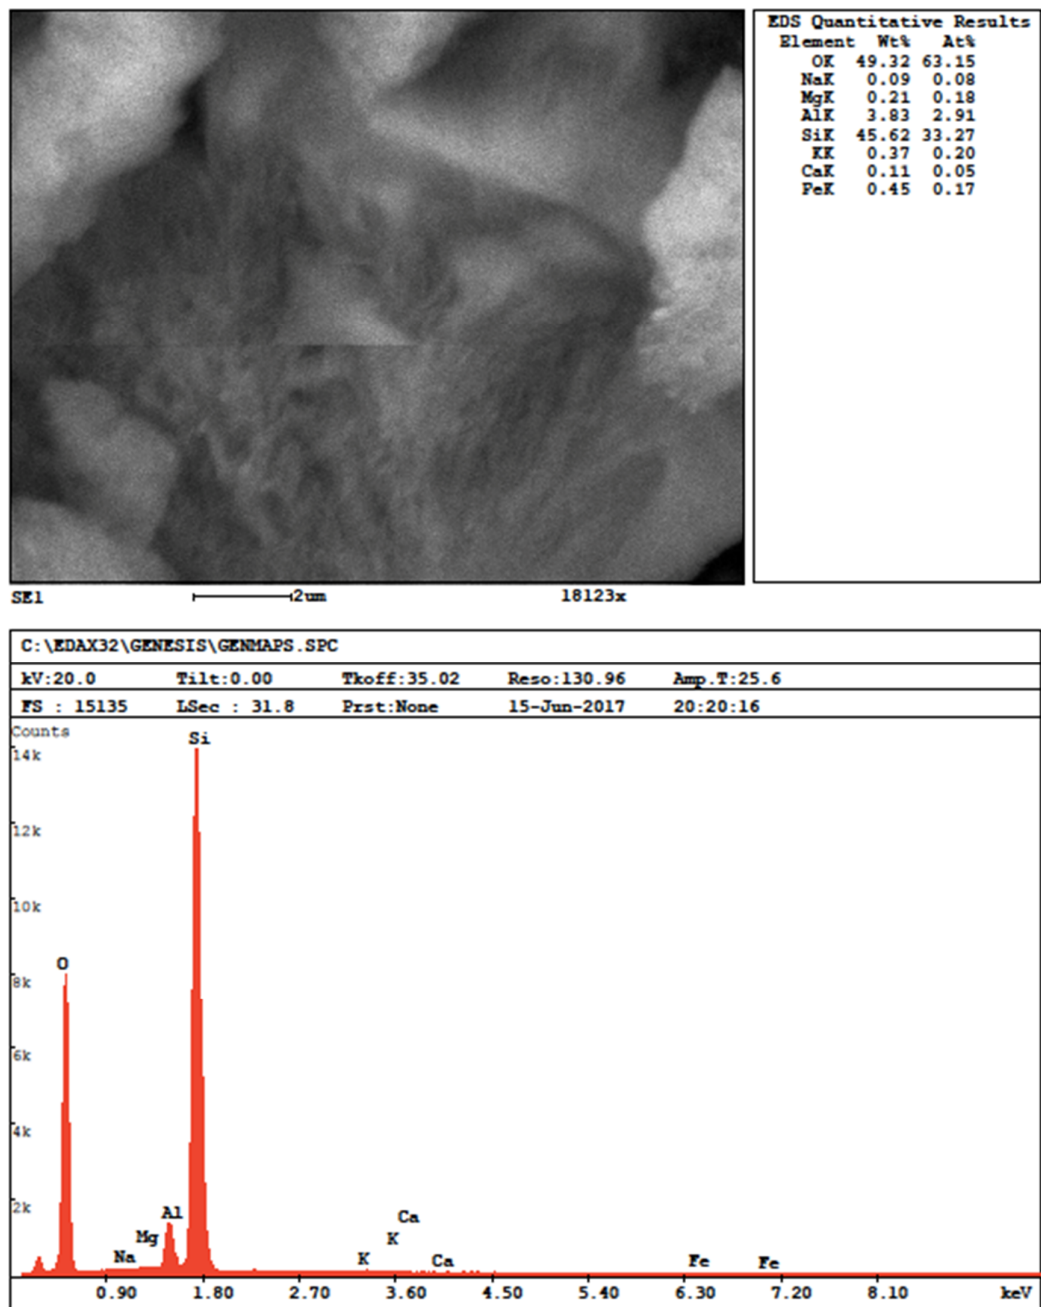

Figure S5. SEM-EDS analysis of ZDES5 sample.
